# Supplementary material
Source: MDPI journal article supplement (https://www.mdpi.com/2673-8007/2/3/42)
Supplement: s1 [file s1]

**Table S-2. Descriptive Statistics for Viral Load in Serum as Measured by Plaque Assay (PFU/mL), Overall**

| Days Post-Exposure | N  | Geometric Mean     | Minimum | Maximum  | Geometric CV (%) | Lower 95% Confidence Bound | Upper 95% Confidence Bound |
|--------------------|----|--------------------|---------|----------|------------------|----------------------------|----------------------------|
| 0                  | 5  | <LOD               | <LOD    | <LOD     | 0.00e+00         | NA                         | NA                         |
| 1                  | 16 | <LOD               | <LOD    | 4.33e+02 | 1.03e+02         | 2.82e+01                   | 6.98e+01                   |
| 2                  | 21 | <LLOQ <sup>^</sup> | <LOD    | 2.31e+03 | 2.53e+02         | 5.40e+01                   | 1.95e+02                   |
| 3                  | 21 | <LLOQ <sup>^</sup> | <LOD    | 1.17e+03 | 2.52e+02         | 7.80e+01                   | 2.82e+02                   |
| 4                  | 21 | <LOD               | <LOD    | 6.11e+02 | 8.23e+01         | 2.83e+01                   | 5.45e+01                   |
| 5                  | 21 | <LOD               | <LOD    | <LOD     | NA               | NA                         | NA                         |
| 6                  | 21 | <LOD               | <LOD    | <LOD     | NA               | NA                         | NA                         |
| 7                  | 21 | <LOD               | <LOD    | <LOD     | NA               | NA                         | NA                         |
| 8                  | 11 | <LOD               | <LOD    | <LOD     | NA               | NA                         | NA                         |
| 9                  | 11 | <LOD               | <LOD    | <LOD     | NA               | NA                         | NA                         |
| 10                 | 17 | <LOD               | <LOD    | <LOD     | NA               | NA                         | NA                         |
| 14/15              | 17 | <LOD               | <LOD    | <LOD     | NA               | NA                         | NA                         |
| 17                 | 8  | <LOD               | <LOD    | <LOD     | NA               | NA                         | NA                         |
| 21                 | 8  | <LOD               | <LOD    | <LOD     | NA               | NA                         | NA                         |
| 24                 | 4  | <LOD               | <LOD    | <LOD     | NA               | NA                         | NA                         |
| 28                 | 4  | <LOD               | <LOD    | <LOD     | NA               | NA                         | NA                         |

<sup>^</sup> Value is > LOD but < LLOQ.

NA Statistic could not be calculated since all measurements were < LOD.
