# Supplementary material
Source: MDPI journal article supplement (https://www.mdpi.com/2673-8007/2/3/42)
Supplement: s1 [file s1]

**Table S-1. Descriptive Statistics for Viral Load in Serum as Measured by RT-qPCR  
(copies/mL), Overall**

| <b>Days Post-Exposure</b> | <b>N</b> | <b>Geometric Mean</b> | <b>Minimum</b> | <b>Maximum</b> | <b>Geometric CV (%)</b> | <b>Lower 95% Confidence Bound</b> | <b>Upper 95% Confidence Bound</b> |
|---------------------------|----------|-----------------------|----------------|----------------|-------------------------|-----------------------------------|-----------------------------------|
| 0                         | 10       | <LOD                  | <LOD           | <LOD           | 0.00e+00                | NA                                | NA                                |
| 1                         | 21       | 7.23e+03              | <LOD           | 2.45e+05       | 4.20e+02                | 3.32e+03                          | 1.57e+04                          |
| 2                         | 26       | 2.46e+05              | 6.98e+03       | 2.52e+06       | 2.09e+02                | 1.46e+05                          | 4.14e+05                          |
| 3                         | 26       | 2.07e+05              | <LOD           | 4.23e+06       | 5.32e+02                | 9.87e+04                          | 4.36e+05                          |
| 4                         | 26       | 1.08e+04              | <LOD           | 5.79e+05       | 3.19e+03                | 3.74e+03                          | 3.14e+04                          |
| 5                         | 26       | <LLOQ^                | <LOD           | 2.85e+04       | 3.68e+02                | 5.79e+02                          | 2.17e+03                          |
| 6                         | 26       | <LOD                  | <LOD           | 6.30e+03       | 8.39e+01                | 3.28e+02                          | 5.91e+02                          |
| 7                         | 26       | <LOD                  | <LOD           | <LOD           | NA                      | NA                                | NA                                |
| 8                         | 16       | <LOD                  | <LOD           | <LOD           | NA                      | NA                                | NA                                |
| 9                         | 16       | <LOD                  | <LOD           | <LOD           | NA                      | NA                                | NA                                |
| 10                        | 17       | <LOD                  | <LOD           | <LOD           | NA                      | NA                                | NA                                |
| 14/15                     | 17       | <LOD                  | <LOD           | <LOD           | NA                      | NA                                | NA                                |
| 17                        | 8        | <LOD                  | <LOD           | <LOD           | NA                      | NA                                | NA                                |
| 20/21                     | 13       | <LOD                  | <LOD           | <LOD           | NA                      | NA                                | NA                                |
| 24                        | 4        | <LOD                  | <LOD           | <LOD           | NA                      | NA                                | NA                                |
| 28                        | 4        | <LOD                  | <LOD           | <LOD           | NA                      | NA                                | NA                                |

^ Value is > LOD but < LLOQ.

NA Statistic could not be calculated since all measurements were < LOD
