# Supplementary material
Source: MDPI journal article supplement (https://www.mdpi.com/2673-8007/2/3/42)
Supplement: s1 [file s1]

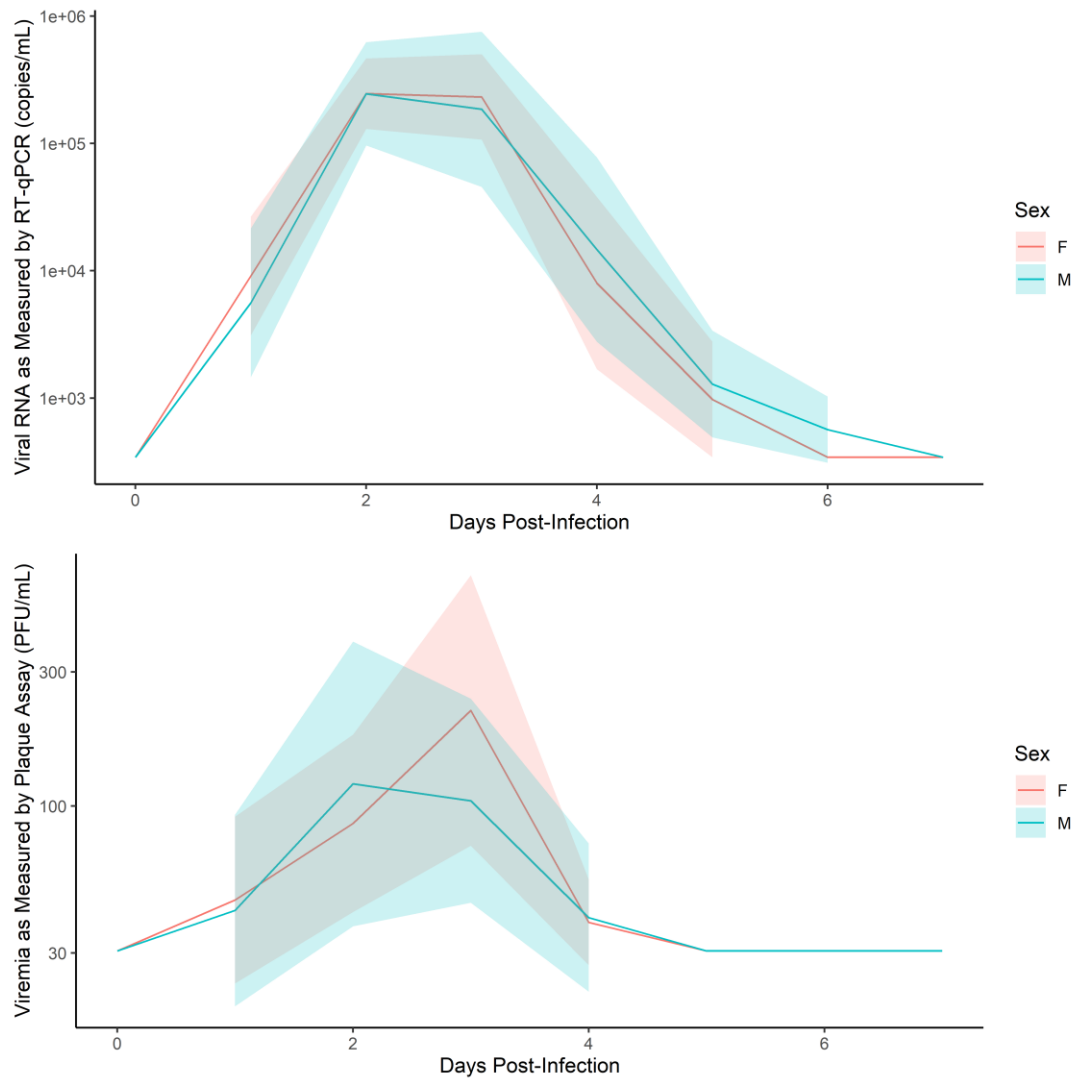

**Figure S1.** Means and Confidence Intervals for Viral Load in Serum by Sex Over Time as Measured by RT-qPCR (copies/mL) and Plaque Assay (PFU/mL).

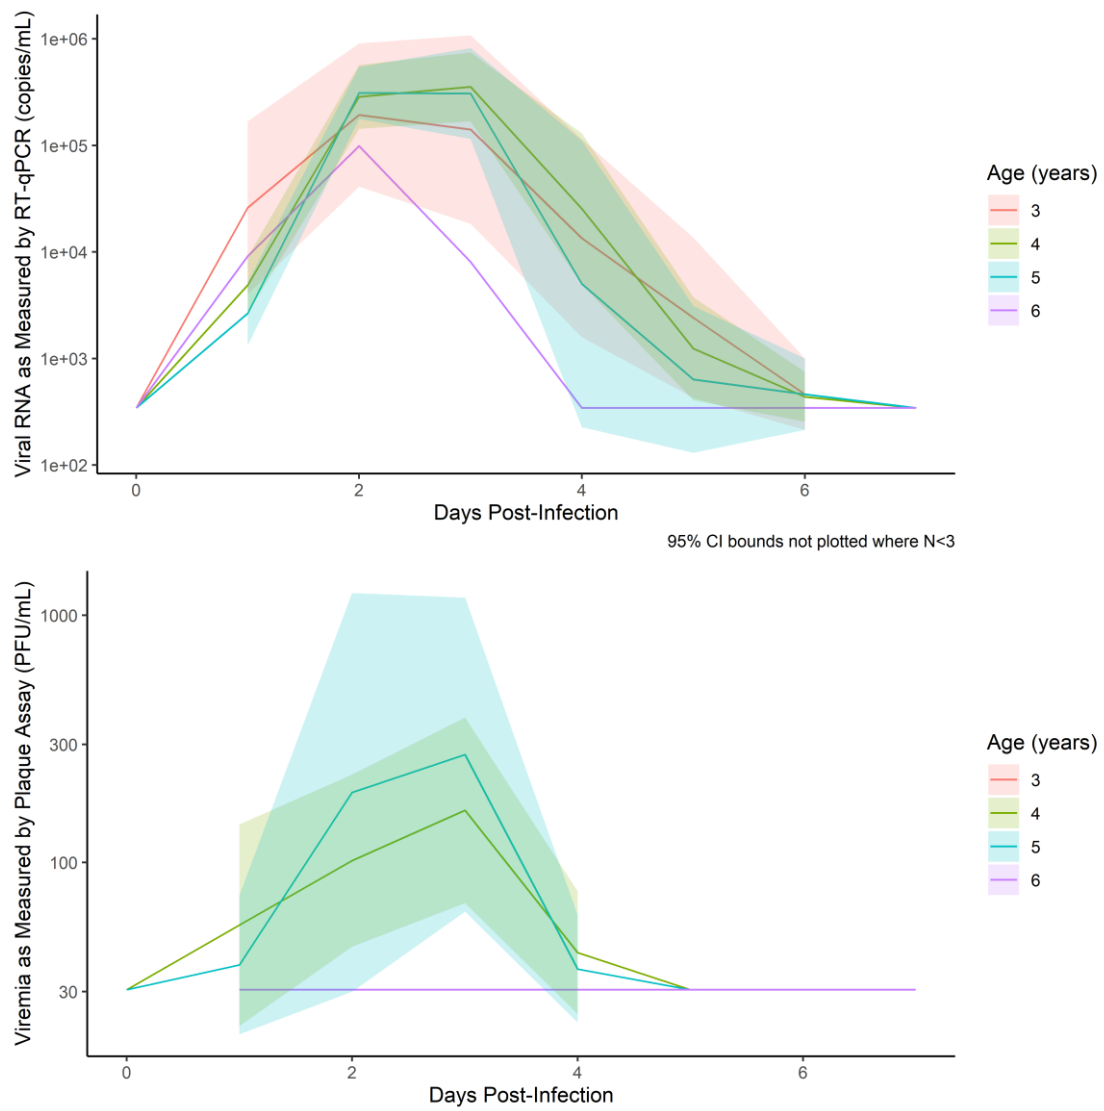

**Figure S2.** Means and Confidence Intervals for Viral Load in Serum by Age Over Time as Measured by RT-qPCR (copies/mL) and Plaque Assay (PFU/mL).

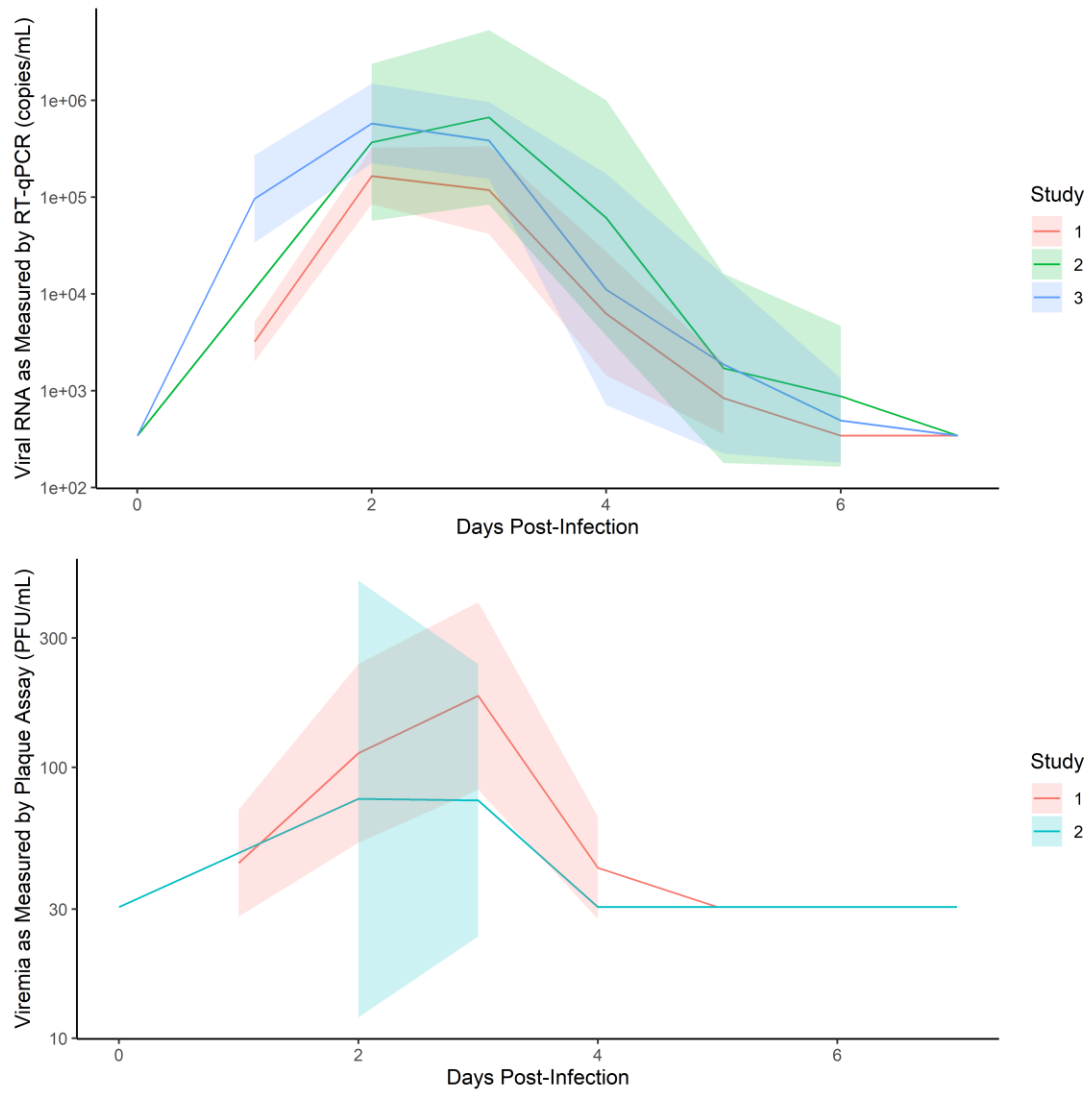

**Figure S3.** Means and Confidence Intervals for Viral Load in Serum by Study Over Time as Measured by RT-qPCR (copies/mL) and Plaque Assay (PFU/mL).
